# Supplementary material
Source: PubMed Central journal article supplement (PMC8259638)
Supplement: ASN.2020071086SupplementaryData1.pdf [file ASN.2020071086SupplementaryData1.pdf]

## Supplemental Methods.

The information of the data from the UK Biobank consortium are available online (URL: <https://www.ukbiobank.ac.uk/data-showcase/>), and the information is identified by field IDs.

The information of general happiness was collected from a touchscreen questionnaire (Field ID 20458) from a question “In general how happy are you?”. Belief that own life is meaningful (Field ID 20460) was collected from a question asking “To what extent do you feel your life to be meaningful?”. Broad depression was determined by presence of a history of seen doctor (Field ID 2090) or a psychiatrist (Field ID 2100) for nerves, anxiety, tension, or depression. The neuroticism score (Field ID 20127) was derived from the number of “yes” answers from the following 12 questions; "Does your mood often go up and down?"; "Do you ever feel 'just miserable' for no reason?"; "Are you an irritable person?"; "Are your feelings easily hurt?"; "Do you often feel 'fedup'?"; "Would you call yourself a nervous person?"; "Are you a worrier?"; "Would you call yourself tense or 'highly strung'?"; "Do you worry too long after an embarrassing experience?"; "Do you suffer from 'nerves'?"; "Do you often feel lonely?"; "Are you often troubled by feelings of guilt?".

Baseline eGFR values were calculated from the information of serum creatinine levels (Field ID 30700), cystatin C levels (Field ID 10720), or both, along with information of ethnicity (Field ID 21000), calculated by the CKD-EPI equation. To determine prevalent history of end-stage kidney disease, we implemented the information for dates of end-stage kidney disease (Field ID 42026), algorithmically defined by the UK Biobank from self-reports and hospital admission records. The ICD-10 diagnostic codes to identify CKD stage 3-5 dialysis, or transplantation histories included N183 (chronic kidney disease, stage 3), N384 (chronic kidney disease, stage 4), N185 (chronic kidney disease, stage 5), N186 (end stage renal disease), Z94 (kidney transplant status), Z49 (encounter for care involving renal dialysis) and the subcodes of them. Presence of any eGFR < 60 mL/min/1.73 m<sup>2</sup>, history of end-stage kidney disease, or ICD-10 diagnostic code indicating stage 3-5 CKD defined the CKD outcome in the UK Biobank data.

Other information was collected by as follows (the numbers of missing values in the clinical analysis dataset): age (Field ID 21003). sex (Field ID 31), smoking history (Field ID 20116,

missing N=1890), body mass index (Field ID 21001, missing N=1842), waist circumference (Field ID 48, missing N=977), total cholesterol (Field ID 30690, missing N=139), HDL cholesterol (Field ID 30760, missing N=39639), LDL cholesterol (Field ID 30780, missing N=922), and self-reported frequency of moderate physical activity per week (Field ID 884, missing N=24358). A history of cardiovascular disease was identified by angina, stroke or heart attack diagnosed by a doctor (Field ID 6150, missing N=1175). Hypertension was determined when people reported a history of treatment with hypertension medication (Field ID 6177 and 6153, missing N=3606). A history of diabetes mellitus was collected by self-report (Field ID 2443, missing N=1542). Glycated hemoglobin A1c levels were collected (Field ID 30750, missing N=24108). Systolic and diastolic BP was determined by the average of two automated measurements (Field ID 4080, missing N=40363, and Field ID 4079, missing N=40351), and those with a single missing measurement were considered to have missing information. Average total household income before tax (Field ID 738, missing N=67856) and number of household members (Field ID 709, missing N=3349) were collected by self-reports. The above missing numbers are presented based on the observational analysis dataset including 468,521 individuals in the UK Biobank.



## *R code to call the causal estimates through the TwoSampleMR package*

Detailed methods to run and install TwoSampleMR package is available in the following URL.

URL: <https://github.com/MRCIEU/TwoSampleMR>

The underlined text requires customization for the data input.

### **##### Beginning of the code #####**

```
require(TwoSampleMR)
require(data.table)
```

### **### Read in the genetic instrument data ###**

```
instrument<-fread("file path for the genetic instrument")
instrument_dat<-format_data(instrument,type="exposure")
```

### **### Read in the outcome summary statistics ###**

```
outcome_file<-read_outcome_data(
  snps=instrument_dat$SNP,
  filename="file path for the outcome summary statistics with predefined column names",
  sep=";",
  snp_col="SNP",
  beta_col="beta.outcome",
  se_col="se.outcome",
  effect_allele_col="effect_allele.outcome",
  other_allele_col="other_allele.outcome",
  eaf_col="eaf.outcome",
  pval_col="pval.outcome",
  samplesize_col="samplesize.outcome"
)
```

### **##### Harmonise data ###**

```
dat <- harmonise_data(
  exposure_dat=instrument_dat,
  outcome_dat=outcome_file
)
```

### **### Perform Mendelian randomization analysis ###**

```
res<-mr(dat,method_list=c("mr_ivw_mre","mr_egger_regression","mr_weighted_median","mr_simple_median"))
res
```

### **### Cochran's Q statistics ###**

```
mr_heterogeneity(dat)
```

**### MR-Egger intercept, pleiotropy test P value ###**

```
mr_pleiotropy_test(dat)
```

**### MR-PRESSO, with significance threshold  $P < 0.05$  by 5000 times of bootstrap replication ###**

```
mrpresso<-run_mr_presso(dat, NbDistribution = 5000, SignifThreshold = 0.05)
```

```
mrpresso
```

**### Draw scatter plots for summary-level Mendelian randomization ###**

```
mr_scatter_plot(res,dat)
```

**Supplemental Table 1.** The study population of the genome-wide association meta-analysis for well-being spectrum by Baselmans BML et al.

| Phenotype           | Included data                      | Number of observations | Brief description of the phenotyping methods                                                                                                                                                                                                                                                                                                                                                                                                                                                                                                                                                                         |
|---------------------|------------------------------------|------------------------|----------------------------------------------------------------------------------------------------------------------------------------------------------------------------------------------------------------------------------------------------------------------------------------------------------------------------------------------------------------------------------------------------------------------------------------------------------------------------------------------------------------------------------------------------------------------------------------------------------------------|
| Positive affect     | SSGAC meta-analysis <sup>a</sup>   | 180,281                | Meta-analysis of cohorts with diverse methods to phenotype positive affect                                                                                                                                                                                                                                                                                                                                                                                                                                                                                                                                           |
|                     | Understanding Society <sup>b</sup> | 8741                   | Self-reported positive affect on a survey                                                                                                                                                                                                                                                                                                                                                                                                                                                                                                                                                                            |
|                     | UK Biobank                         | 221,575                | Self-reported general happiness (Field ID 4526/20458), graded as extremely unhappy, very unhappy, moderately unhappy, moderately happy, very happy, and extremely happy.                                                                                                                                                                                                                                                                                                                                                                                                                                             |
| Life satisfaction   | SSGAC meta-analysis <sup>a</sup>   | 71,650                 | Meta-analysis of cohorts with diverse methods to phenotype life satisfaction <sup>a</sup>                                                                                                                                                                                                                                                                                                                                                                                                                                                                                                                            |
|                     | Understanding Society <sup>b</sup> | 9202                   | Self-reported life satisfaction on a survey                                                                                                                                                                                                                                                                                                                                                                                                                                                                                                                                                                          |
| Depressive symptoms | SSGAC meta-analysis <sup>a</sup>   | 161,460                | Meta-analysis of cohorts with diverse methods to phenotype depressive symptoms <sup>a</sup>                                                                                                                                                                                                                                                                                                                                                                                                                                                                                                                          |
|                     | 23andMe <sup>c</sup>               | 228,033                | Self-reported online surveys, and the sources from survey answers collected for maximum 6 times were utilized to determine depression trait.                                                                                                                                                                                                                                                                                                                                                                                                                                                                         |
|                     | CHARGE <sup>d</sup>                | 51,258                 | Depressive symptoms measured with the CES-D scale was used to determine ones' depressive symptoms.                                                                                                                                                                                                                                                                                                                                                                                                                                                                                                                   |
|                     | Understanding Society <sup>b</sup> | 9203                   | Self-reported depression on a survey                                                                                                                                                                                                                                                                                                                                                                                                                                                                                                                                                                                 |
|                     | UK Biobank                         | 422,483                | Self-reported history of seen a doctor for nerves, anxiety, tension, or depression (Field ID 2090)                                                                                                                                                                                                                                                                                                                                                                                                                                                                                                                   |
|                     | UK Biobank                         | 423,509                | Self-reported history of seen a psychiatrist for nerves, anxiety, tension, or depression (Field ID 2100)                                                                                                                                                                                                                                                                                                                                                                                                                                                                                                             |
| Neuroticism         | SSGAC meta-analysis <sup>a</sup>   | 59,206                 | Meta-analysis of cohorts with diverse methods to phenotype neuroticism <sup>a</sup>                                                                                                                                                                                                                                                                                                                                                                                                                                                                                                                                  |
|                     | 23andMe <sup>c</sup>               | 170,911                | Neuroticism score collected from online survey determined by the Big Five Personality trait.                                                                                                                                                                                                                                                                                                                                                                                                                                                                                                                         |
|                     | Understanding Society <sup>b</sup> | 8198                   | Neuroticism score determined by the Big Five Personality trait                                                                                                                                                                                                                                                                                                                                                                                                                                                                                                                                                       |
|                     | UK Biobank                         | 344,674                | Neuroticism score (Field ID 20127), which was determined by the number of "yes" answers from the following 12 questions; "Does your mood often go up and down?"; "Do you ever feel 'just miserable' for no reason?"; "Are you an irritable person?"; "Are your feelings easily hurt?"; "Do you often feel 'fedup'?"; "Would you call yourself a nervous person?"; "Are you a worrier?"; "Would you call yourself tense or 'highly strung'?"; "Do you worry too long after an embarrassing experience?"; "Do you suffer from 'nerves'?"; "Do you often feel lonely?"; "Are you often troubled by feelings of guilt?". |

<sup>a</sup> Okbay A, Baselmans BM, De Neve JE, et al. Genetic variants associated with subjective well-being, depressive symptoms, and neuroticism identified through genome-wide analyses. *Nat Genet.* 2016;48(6):624-33.

<sup>b</sup> Understanding society website (URL: <https://www.understandingsociety.ac.uk/documentation>, last accessed 2020-09-24).

<sup>c</sup> Hyde CL, Nagle MW, Tian C, et al. *Nat Genet.* 2016;48(9):1031-6.

<sup>d</sup> Hek K, Demirkan A, Lahti J, et al. A genome-wide association study of depressive symptoms. *Biol Psychiatry.* 2013;73(7):667-78.

<sup>e</sup> Lo MT, Hinds DA, Tung JY, et al. Genome-wide analyses for personality traits identify six genomic loci and show correlations with psychiatric disorders. *Nat Genet.* 2017;49(1):152-156.

**Supplemental Table 2.** Characteristics of the CKDGen genome-wide association meta-analysis dataset of the European ancestry.

|                                           | CKDGen of European ancestry     |
|-------------------------------------------|---------------------------------|
| Number of studies meta-analyzed           | 85                              |
| Number of individuals with eGFR           | 567,460                         |
| Median age (years)                        | 50.1                            |
| Median eGFR (mL/min/1.73 m <sup>2</sup> ) | 91.4                            |
| Proportion of male sex (%)                | 48                              |
| Chronic kidney disease (%)                | 9 (total 460,698, cases 41,395) |

The details of the dataset are available in Wuttke M, Li Y, Li M, Sieber KB, et al. A catalog of genetic loci associated with kidney function from analyses of a million individuals. *Nat Genet.* 2019;51(6):957-972.

**Supplemental Table 3.** Characteristics of the observational analysis dataset of the UK Biobank.

|                                                                                        | Total (N=468,521) | Female (N=254,048) | Male (N=214,473) |
|----------------------------------------------------------------------------------------|-------------------|--------------------|------------------|
| General happiness                                                                      |                   |                    |                  |
| Extremely happy                                                                        | 14,670 (10.0%)    | 7905 (9.6%)        | 6756 (10.6%)     |
| Very happy                                                                             | 65,194 (44.4%)    | 36,638 (44.2%)     | 28,556 (44.6%)   |
| Moderately happy                                                                       | 58,822 (40.1%)    | 33,751 (40.8%)     | 25,071 (39.1%)   |
| Moderately unhappy                                                                     | 6512 (4.4%)       | 3540 (4.3%)        | 2972 (4.6%)      |
| Very unhappy                                                                           | 1289 (0.9%)       | 756 (0.9%)         | 533 (0.8%)       |
| Extremely unhappy                                                                      | 400 (0.3%)        | 224 (0.3%)         | 176 (0.3%)       |
| Belief that own life is meaningful                                                     |                   |                    |                  |
| An extreme amount                                                                      | 18,676 (13.0%)    | 10,867 (13.3%)     | 7809 (12.5%)     |
| Very much                                                                              | 76,136 (52.8%)    | 42,676 (52.2%)     | 33,460 (53.5%)   |
| A moderate amount                                                                      | 38,386 (26.6%)    | 22,048 (27.0%)     | 16,338 (26.1%)   |
| A little                                                                               | 8558 (5.9%)       | 4873 (6.0%)        | 3685 (5.9%)      |
| Not at all                                                                             | 2430 (1.7%)       | 1221 (1.5%)        | 1209 (1.9%)      |
| Broad depression (history of medical visit for depression-related psychiatric symptom) | 161349 (34.4%)    | 104692 (41.2%)     | 56,657 (26.4%)   |
| Neuroticism score                                                                      | 4 [1;6]           | 4 [2;7]            | 3 [1;6]          |
| Age (years)                                                                            | 58 [50;63]        | 57 [50;63]         | 58 [50;64]       |
| Body mass index (kg/m <sup>2</sup> )                                                   | 26.7 [24.1;29.9]  | 26.1 [23.5;29.7]   | 27.3 [25.0;30.1] |
| Obesity ( $\geq 30$ kg/m <sup>2</sup> )                                                | 113,611 (24.3%)   | 59,414 (23.5%)     | 54,197 (25.4%)   |
| Waist circumference (cm)                                                               | 90 [80;99]        | 83 [75;92]         | 96 [89;103]      |
| Central obesity ( $\geq 102$ cm for male $\geq 86$ cm for female)                      | 156,991 (33.6%)   | 91,932 (36.3%)     | 65,059 (30.4%)   |
| Smoking history                                                                        |                   |                    |                  |
| Nonsmoker                                                                              | 255,391 (54.7%)   | 150,788 (59.6%)    | 104,603 (49.0%)  |
| Ex-smoker                                                                              | 162,008 (34.7%)   | 79,697 (31.5%)     | 82,311 (38.5%)   |
| Current smoker                                                                         | 49,232 (10.6%)    | 22,574 (8.9%)      | 26,658 (12.5%)   |
| Frequency of moderate physical activity (days/week)                                    | 3 [2;5]           | 3 [2;5]            | 3 [2;5]          |
| Household income before tax                                                            |                   |                    |                  |
| < 18000 £                                                                              | 91,106 (22.7%)    | 51,875 (24.7%)     | 39,231 (20.5%)   |
| 18000 to 30999 £                                                                       | 101,895 (25.4%)   | 55,176 (26.3%)     | 46,719 (24.5%)   |
| 31000 to 51999 £                                                                       | 104,435 (26.1%)   | 53,285 (25.4%)     | 51,150 (26.8%)   |
| 52000 to 100000 £                                                                      | 81,532 (20.4%)    | 39,237 (18.7%)     | 42,295 (22.1%)   |
| > 100000 £                                                                             | 21,697 (5.4%)     | 10,100 (4.8%)      | 11,597 (6.1%)    |
| Hypertension                                                                           | 97,723 (21.0%)    | 44,786 (17.7%)     | 52,937 (24.9%)   |
| Systolic BP (mmHg)                                                                     | 136 [125;150]     | 133 [121;147]      | 139 [129;152]    |
| Diastolic BP (mmHg)                                                                    | 82 [75;89]        | 80 [74;87]         | 84 [77;91]       |
| Diabetes mellitus                                                                      | 24,468 (5.2%)     | 9533 (3.8%)        | 14,935 (7.0%)    |
| Hemoglobin A1c (mmol/L)                                                                | 35.2 [32.8;37.9]  | 35.2 [32.7;37.7]   | 35.3 [32.8;38.1] |
| Dyslipidemia medication                                                                | 81,595 (17.6%)    | 32,304 (12.8%)     | 49,291 (23.2%)   |
| Total cholesterol (mmol/L)                                                             | 5.65 [4.91;6.42]  | 5.81 [5.09;6.59]   | 5.45 [4.71;6.21] |
| LDL cholesterol (mmol/L)                                                               | 3.52 [2.94;4.12]  | 3.57 [3.01;4.18]   | 3.46 [2.87;4.05] |
| HDL cholesterol (mmol/L)                                                               | 1.40 [1.17;1.67]  | 1.55 [1.32;1.82]   | 1.24 [1.06;1.45] |
| Hx of angina, heart attack, or stroke                                                  | 27,061 (5.79%)    | 8672 (3.42%)       | 18,389 (8.60%)   |
| CKD-EPI eGFR (mL/min/1.73 m <sup>2</sup> ) <sup>a</sup>                                | 91.2 [81.4;100.4] | 91.8 [81.6;101.1]  | 90.6 [81.2;99.6] |
| CKD stage 3-5                                                                          | 28,627 (6.1%)     | 15,465 (6.1%)      | 13,1623 (6.1%)   |
| by creatinine-cystatin C eGFR < 60                                                     | 11,608 (2.5%)     | 6040 (2.4%)        | 5568 (2.6%)      |
| by cystatin C eGFR < 60                                                                | 21,838 (4.7%)     | 11,588 (4.6%)      | 10,250 (4.8%)    |
| by creatinine eGFR < 60                                                                | 10,701 (2.3%)     | 5716 (2.3%)        | 5568 (2.6%)      |
| by a history of end-stage kidney disease                                               | 986 (0.2%)        | 364 (0.1%)         | 622 (0.3%)       |
| by ICD-10 diagnostic codes                                                             | 5485 (1.2%)       | 2654 (1.0%)        | 2831 (1.3%)      |

BP = blood pressure, LDL = low-density lipoprotein, HDL = high-density lipoprotein, CKD = chronic kidney disease

Descriptive statistics are presented as numbers (%) for categorical variables and medians [interquartile ranges] for continuous variables. The numbers of individuals with missing information are presented in Supplemental Method.

<sup>a</sup> eGFR values by creatinine-cystatin C CKD-EPI equation.

**Supplemental Table 4.** Association between psychological well-being and age or sex.

| <b>Outcome</b>                                                 | <b>Exposure</b>        | <b>adjusted OR (95% CI)<sup>a</sup></b> | <b>P</b> |
|----------------------------------------------------------------|------------------------|-----------------------------------------|----------|
| General happiness (Moderately, very, or extremely happy)       | Age (years)            | 1.05 (1.05-1.05)                        | < 0.001  |
|                                                                | Male sex (ref. female) | 0.90 (0.86-0.94)                        | < 0.001  |
| Belief that own life is meaningful (very or an extreme amount) | Age (years)            | 1.02 (1.02-1.02)                        | < 0.001  |
|                                                                | Male sex (ref. female) | 1.00 (0.98-1.03)                        | 0.80     |
| Broad depression                                               | Age (years)            | 0.99 (0.99-0.99)                        | < 0.001  |
|                                                                | Male sex (ref. female) | 0.51 (0.51-0.52)                        | < 0.001  |
| Neuroticism (score $\geq$ 5)                                   | Age (years)            | 0.98 (0.98-0.98)                        | < 0.001  |
|                                                                | Male sex (ref. female) | 0.61 (0.60-0.62)                        | < 0.001  |

Multivariable logistic regression model including age and sex was constructed to investigate the associations.

**Supplemental Table 7.** Summary-level MR results for the causal estimates from psychological well-being on risk of CKD from the genetic instrument with stronger association ( $P < 1 \times 10^{-10}$ ) with the well-being exposures.

| Genetically predicted exposure | N of SNPs of the genetic instrument | Cochran's Q statistics P value | MR-Egger pleiotropy test P value | MR method                             | OR (CKD) (95% confidence interval) <sup>a</sup> | P     |
|--------------------------------|-------------------------------------|--------------------------------|----------------------------------|---------------------------------------|-------------------------------------------------|-------|
| Positive affect                | 43                                  | 0.003                          | 0.79                             | Multiplicative random-effect IVW      | 0.58 (0.38; 0.89)                               | 0.01  |
|                                |                                     |                                |                                  | MR-Egger                              | 0.46 (0.08; 2.75)                               | 0.40  |
|                                |                                     |                                |                                  | Weighted median                       | 0.60 (0.37; 0.98)                               | 0.04  |
|                                |                                     |                                |                                  | Simple median                         | 0.46 (0.28; 0.75)                               | 0.002 |
|                                |                                     |                                |                                  | MR-PRESSO (identified 2 outlier SNPs) | 0.59 (0.40; 0.85)                               | 0.008 |
| Life satisfaction              | 27                                  | 0.02                           | 0.34                             | Multiplicative random-effect IVW      | 0.65 (0.39; 1.07)                               | 0.09  |
|                                |                                     |                                |                                  | MR-Egger                              | 0.17 (0.01; 2.61)                               | 0.22  |
|                                |                                     |                                |                                  | Weighted median                       | 0.74 (0.43; 1.27)                               | 0.27  |
|                                |                                     |                                |                                  | Simple median                         | 0.74 (0.42; 1.30)                               | 0.29  |
|                                |                                     |                                |                                  | MR-PRESSO (identified 2 outlier SNPs) | 0.66 (0.45; 0.97)                               | 0.047 |
| Depressive symptom             | 60                                  | < 0.001                        | 0.72                             | Multiplicative random-effect IVW      | 1.59 (1.04; 2.43)                               | 0.03  |
|                                |                                     |                                |                                  | MR-Egger                              | 2.45 (0.23; 26.11)                              | 0.46  |
|                                |                                     |                                |                                  | Weighted median                       | 2.01 (1.24; 3.25)                               | 0.004 |
|                                |                                     |                                |                                  | Simple median                         | 2.22 (1.36; 3.61)                               | 0.001 |
|                                |                                     |                                |                                  | MR-PRESSO (identified 1 outlier SNPs) | 1.47 (0.98; 2.21)                               | 0.07  |
| Neuroticism                    | 57                                  | < 0.001                        | 0.79                             | Multiplicative random-effect IVW      | 1.30 (0.97; 1.74)                               | 0.08  |
|                                |                                     |                                |                                  | MR-Egger                              | 1.65 (0.28; 9.65)                               | 0.58  |
|                                |                                     |                                |                                  | Weighted median                       | 1.74 (1.23; 2.46)                               | 0.002 |
|                                |                                     |                                |                                  | Simple median                         | 1.75 (1.23; 2.50)                               | 0.002 |
|                                |                                     |                                |                                  | MR-PRESSO (identified 1 outlier SNP)  | 1.23 (0.94; 1.63)                               | 0.14  |

SNP = single nucleotide polymorphism, MR = Mendelian randomization, eGFR = estimated glomerular filtration rate, CKD = chronic kidney disease, IVW = inverse variance weighted

<sup>a</sup> The effect sizes were from the genetic predisposition scaled to a z score in the previous model-averaging genome-wide association meta-analysis setting phenotype variance to 1.

**Supplemental Table 8.** Summary-level MR results for the causal estimates from psychological well-being on eGFR change (%) from the genetic instrument with stronger association ( $P < 1 \times 10^{-10}$ ) with the well-being exposures.

| Genetically predicted exposure | N of SNPs of the genetic instrument | Cochran's Q statistics P value | MR-Egger pleiotropy test P value | MR method                             | beta (eGFR change, %) (95% confidence interval) a | P     |
|--------------------------------|-------------------------------------|--------------------------------|----------------------------------|---------------------------------------|---------------------------------------------------|-------|
| Positive affect                | 43                                  | < 0.001                        | 0.96                             | Multiplicative random-effect IVW      | 1.58 (-0.62; 3.83)                                | 0.16  |
|                                |                                     |                                |                                  | MR-Egger                              | 1.35 (-7.70; 11.27)                               | 0.78  |
|                                |                                     |                                |                                  | Weighted median                       | -0.05 (-2.12; 2.08)                               | 0.97  |
|                                |                                     |                                |                                  | Simple median                         | 0.41 (-1.71; 2.57)                                | 0.71  |
|                                |                                     |                                |                                  | MR-PRESSO (identified 3 outlier SNPs) | 1.34 (-0.69; 3.41)                                | 0.20  |
| Life satisfaction              | 27                                  | < 0.001                        | 0.02                             | Multiplicative random-effect IVW      | 1.90 (-0.57; 4.43)                                | 0.09  |
|                                |                                     |                                |                                  | MR-Egger                              | 17.89 (4.45; 33.06)                               | 0.01  |
|                                |                                     |                                |                                  | Weighted median                       | 1.27 (-1.10; 3.69)                                | 0.30  |
|                                |                                     |                                |                                  | Simple median                         | 0.90 (-1.40; 3.26)                                | 0.45  |
|                                |                                     |                                |                                  | MR-PRESSO (identified 1 outlier SNPs) | -1.14 (-3.21; 0.98)                               | 0.30  |
| Depressive symptom             | 60                                  | < 0.001                        | 0.30                             | Multiplicative random-effect IVW      | -3.20 (-5.16; -1.20)                              | 0.002 |
|                                |                                     |                                |                                  | MR-Egger                              | -8.75 (-18.41; 2.04)                              | 0.11  |
|                                |                                     |                                |                                  | Weighted median                       | -1.90 (-3.74; -0.02)                              | 0.048 |
|                                |                                     |                                |                                  | Simple median                         | -2.11 (-4.05; -0.12)                              | 0.04  |
|                                |                                     |                                |                                  | MR-PRESSO (identified 2 outlier SNPs) | -2.53 (-4.32; -0.70)                              | 0.009 |
| Neuroticism                    | 57                                  | < 0.001                        | 0.60                             | Multiplicative random-effect IVW      | -1.57 (-3.20; 0.09)                               | 0.06  |
|                                |                                     |                                |                                  | MR-Egger                              | -4.13 (-13.32; 6.02)                              | 0.41  |
|                                |                                     |                                |                                  | Weighted median                       | -0.97 (-2.37; 0.44)                               | 0.18  |
|                                |                                     |                                |                                  | Simple median                         | -0.93 (-2.30; 0.47)                               | 0.19  |
|                                |                                     |                                |                                  | MR-PRESSO (identified 4 outlier SNP)  | -1.54 (-2.88; -0.19)                              | 0.03  |

SNP = single nucleotide polymorphism, MR = Mendelian randomization, eGFR = estimated glomerular filtration rate, IVW = inverse variance weighted

<sup>a</sup> The effect sizes were from the genetic predisposition scaled to a z score in the previous model-averaging genome-wide association meta-analysis setting phenotype variance to 1



**Supplemental Table 9.** Sensitivity analysis results by including SNPs ranges of association strengths for psychologic well-being as the genetic instruments for summary-level MR.

| Outcome         | Genetically predicted exposure | P threshold for filtering SNPs | Remining N of SNPs in the genetic instrument | Beta (eGFR, % change) or OR (CKD) (95% confidence interval) <sup>a</sup> | P by multiplicative random-effect IVW | MR-Egger pleiotropy test P value |
|-----------------|--------------------------------|--------------------------------|----------------------------------------------|--------------------------------------------------------------------------|---------------------------------------|----------------------------------|
| CKD             | Positive affect                | < 5×10 <sup>-8</sup>           | 139                                          | 0.77 (0.60; 0.99)                                                        | 0.04                                  | 0.06                             |
|                 |                                | < 1×10 <sup>-8</sup>           | 102                                          | 0.69 (0.52; 0.91)                                                        | 0.008                                 | 0.23                             |
|                 |                                | < 1×10 <sup>-9</sup>           | 66                                           | 0.68 (0.49; 0.94)                                                        | 0.02                                  | 0.56                             |
|                 |                                | < 1×10 <sup>-10</sup>          | 43                                           | 0.58 (0.38; 0.89)                                                        | 0.01                                  | 0.79                             |
|                 | Life satisfaction              | < 5×10 <sup>-8</sup>           | 103                                          | 0.90 (0.69; 1.18)                                                        | 0.45                                  | 0.01                             |
|                 |                                | < 1×10 <sup>-8</sup>           | 76                                           | 0.77 (0.57; 1.04)                                                        | 0.09                                  | 0.05                             |
|                 |                                | < 1×10 <sup>-9</sup>           | 50                                           | 0.69 (0.48; 1.00)                                                        | 0.05                                  | 0.19                             |
|                 |                                | < 1×10 <sup>-10</sup>          | 27                                           | 0.65 (0.39; 1.07)                                                        | 0.09                                  | 0.34                             |
|                 | Depressive symptom             | < 5×10 <sup>-8</sup>           | 176                                          | 1.34 (1.03; 1.73)                                                        | 0.03                                  | 0.14                             |
|                 |                                | < 1×10 <sup>-8</sup>           | 125                                          | 1.45 (1.07; 1.96)                                                        | 0.02                                  | 0.07                             |
|                 |                                | < 1×10 <sup>-9</sup>           | 83                                           | 1.43 (1.00; 2.04)                                                        | 0.049                                 | 0.13                             |
|                 |                                | < 1×10 <sup>-10</sup>          | 60                                           | 1.59 (1.04; 2.43)                                                        | 0.034                                 | 0.72                             |
|                 | Neuroticism                    | < 5×10 <sup>-8</sup>           | 187                                          | 1.13 (0.95; 1.34)                                                        | 0.18                                  | 0.43                             |
|                 |                                | < 1×10 <sup>-8</sup>           | 133                                          | 1.16 (0.96; 1.41)                                                        | 0.12                                  | 0.11                             |
|                 |                                | < 1×10 <sup>-9</sup>           | 88                                           | 1.24 (0.98; 1.55)                                                        | 0.07                                  | 0.12                             |
|                 |                                | < 1×10 <sup>-10</sup>          | 57                                           | 1.30 (0.97; 1.74)                                                        | 0.07                                  | 0.79                             |
| eGFR (% change) | Positive affect                | < 5×10 <sup>-8</sup>           | 139                                          | 1.34 (0.09; 2.6)                                                         | 0.04                                  | 0.67                             |
|                 |                                | < 1×10 <sup>-8</sup>           | 102                                          | 1.50 (0.09; 2.93)                                                        | 0.04                                  | 0.83                             |
|                 |                                | < 1×10 <sup>-9</sup>           | 66                                           | 1.09 (-0.73; 2.95)                                                       | 0.24                                  | 0.87                             |
|                 |                                | < 1×10 <sup>-10</sup>          | 43                                           | 1.58 (-0.62; 3.83)                                                       | 0.16                                  | 0.96                             |
|                 | Life satisfaction              | < 5×10 <sup>-8</sup>           | 103                                          | 0.81 (-0.48; 2.12)                                                       | 0.22                                  | 0.17                             |
|                 |                                | < 1×10 <sup>-8</sup>           | 76                                           | 1.25 (-0.30; 2.83)                                                       | 0.11                                  | 0.04                             |
|                 |                                | < 1×10 <sup>-9</sup>           | 50                                           | 0.99 (-0.92; 2.94)                                                       | 0.31                                  | 0.04                             |
|                 |                                | < 1×10 <sup>-10</sup>          | 27                                           | 1.90 (-0.57; 4.43)                                                       | 0.13                                  | 0.02                             |
|                 | Depressive symptom             | < 5×10 <sup>-8</sup>           | 176                                          | -2.00 (-3.24; -0.75)                                                     | 0.002                                 | 0.002                            |
|                 |                                | < 1×10 <sup>-8</sup>           | 125                                          | -2.18 (-3.61; -0.72)                                                     | 0.003                                 | 0.001                            |
|                 |                                | < 1×10 <sup>-9</sup>           | 83                                           | -2.58 (-4.34; -0.78)                                                     | 0.005                                 | 0.02                             |
|                 |                                | < 1×10 <sup>-10</sup>          | 60                                           | -3.20 (-5.16; -1.20)                                                     | 0.002                                 | 0.30                             |
|                 | Neuroticism                    | < 5×10 <sup>-8</sup>           | 187                                          | -0.91 (-1.76; -0.05)                                                     | 0.04                                  | 0.06                             |
|                 |                                | < 1×10 <sup>-8</sup>           | 133                                          | -0.88 (-1.87; 0.13)                                                      | 0.09                                  | 0.02                             |
|                 |                                | < 1×10 <sup>-9</sup>           | 88                                           | -1.09 (-2.34; 0.18)                                                      | 0.09                                  | 0.07                             |
|                 |                                | < 1×10 <sup>-10</sup>          | 57                                           | -1.57 (-3.20; 0.09)                                                      | 0.06                                  | 0.06                             |

SNP = single nucleotide polymorphism, MR = Mendelian randomization, eGFR = estimated glomerular filtration rate, CKD = chronic kidney disease, IVW = inverse variance weighted

<sup>a</sup> The effect sizes were from the genetical predisposition scaled to a z-score in the previous N-weighted multivariate genome-wide association meta-analysis setting phenotype variance to 1.

**Supplemental Figure 1.** Scatter plots visualizing the summary-level Mendelian randomization results.

**SNPs with  $P < 1 \times 10^{-8}$  association**

**SNPs with  $P < 1 \times 10^{-10}$  association**

**CKD**

**eGFR**

**CKD**

**eGFR**

**Positive affect**

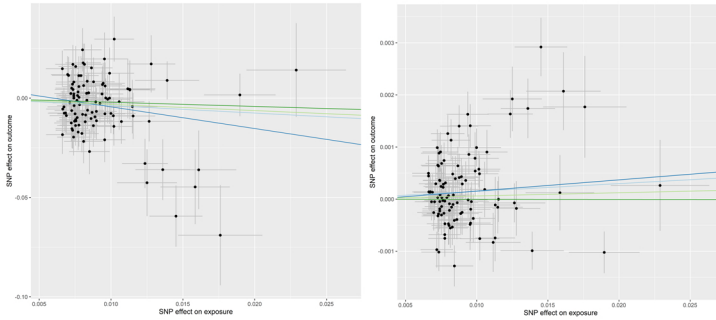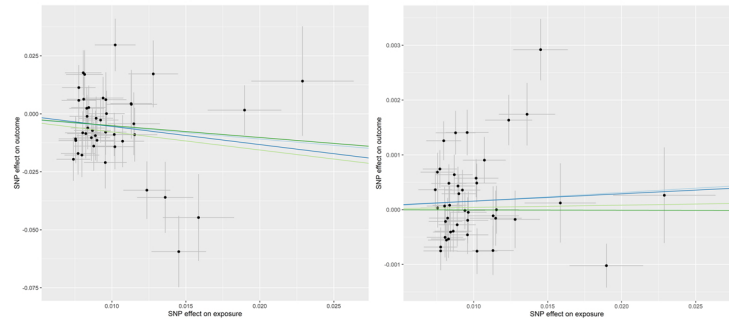

**Life satisfaction**

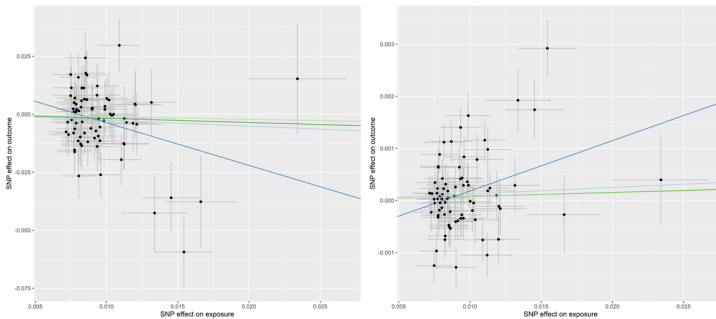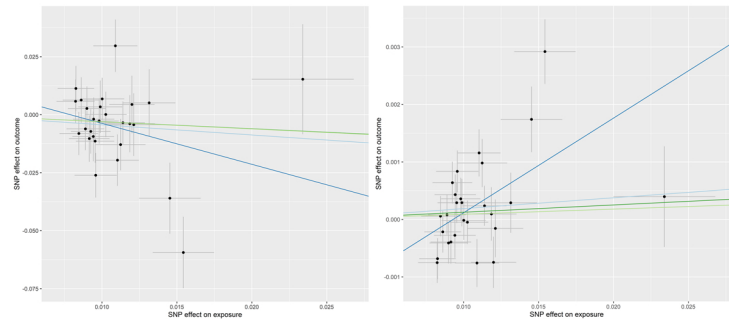

**Depressive symptoms**

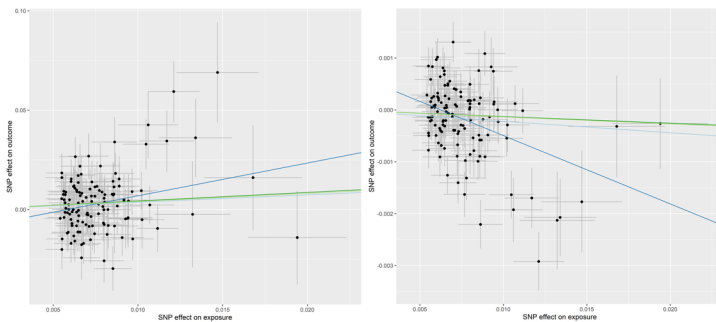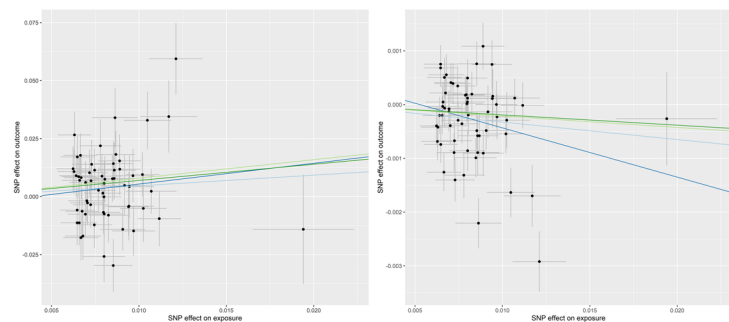

**Neuroticism**

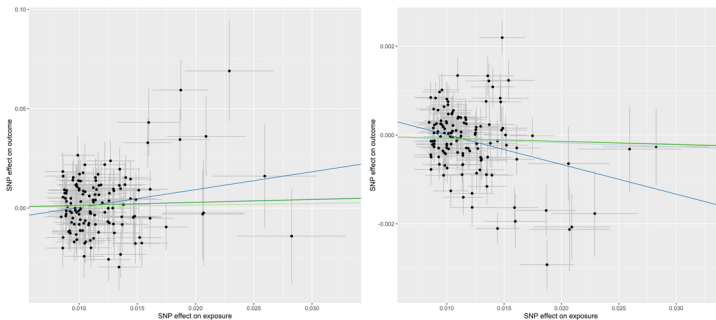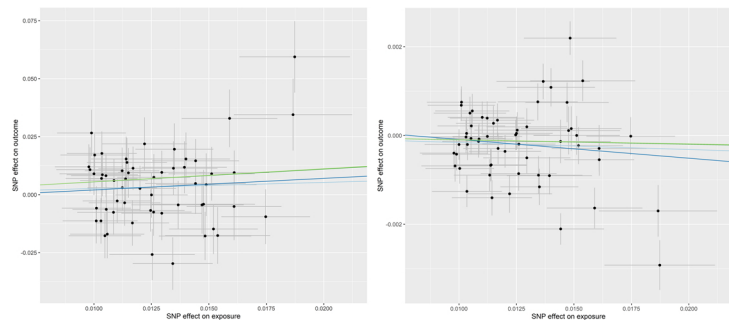

Inverse variance weighted
  MR Egger
  Simple median
  Weighted median

Of the scatter plots, the x-axes indicate the SNP effect on exposure (positive affect, life satisfaction, depressive symptoms, or neuroticism), and the y-axes indicate the SNP effect on outcome (eGFR or chronic kidney disease). The left eight graphs show the results when all Bonferroni-adjusted significant SNPs ( $P < 1 \times 10^{-8}$ ) were utilized as the genetic instrument. The right eight graphs show the results when SNPs with stronger ( $P < 1 \times 10^{-10}$ ) associations with each psychologic well-being phenotype were utilized. The four lines indicate the results from the inverse variance weighted (purple), MR-Egger (blue), simple median (light green), and weighted-median (green) methods.
